# Supplementary material for: Beyond the fluorescence labelling of novel nitrogen-doped silicon quantum dots: the reducing agent and stabilizer for preparing hybrid nanoparticles and antibacterial applications
Source: Royal Society of Chemistry journal article supplement (doi:10.1039/d2tb01304e), 2022-01-01
Supplement: d2tb01304e1.pdf [file d2tb01304e1.pdf]

## SUPPORTING INFORMATION

### **Beyond the fluorescence labelling of novel nitrogen-doped silicon quantum dot: reducing agent and stabilizer for preparing hybrid nanoparticles and antibacterial applications**

*Yi-Fan Wang, Meng-Meng Pan, Yong-Li Song, Zhi Li, Le Wang, Ming Jiang, Xu Yu\*, Li Xu\**

Address: Tongji School of Pharmacy, Huazhong University of Science and Technology, Wuhan 430030, PR China.

\*Corresponding authors: E-mail: xuyu@hust.edu.cn; xulpharm@mails.tjmu.edu.cn.

#### **Summary**

The supporting information file includes 8 Pages, 6 Figures and 1 table.

#### **List of Figures**

Fig. S1 The Si 2p (A), C 1s (B) and O 1s (C) XPS spectrum, and FT-IR spectrum (D) of N-SiQDs.

Fig. S2 The photobleaching resistance of calcein (A) and N-SiQDs (B) labeled bacteria. (C) The fluorescence quantitative results under different conditions. \*\*\* $p < 0.005$ .

Fig. S3 (A) The UV spectrum and photograph (insert) of N-SiQDs mixed with AgNO<sub>3</sub>. (B) Photographs of TEPA-CDs (a), APTMS-SiQDs (b), N-SiQDs (c) and TEPA-CDs/APTMS-SiQDs (v/v=1:1) (d) mixed with HAuCl<sub>4</sub>, respectively.

Fig. S4 Photographs of bacterial colonies of *S. aureus* (A-D) and *E. coli* (E-H) cells with different treatments, respectively. (A and E: normal saline, B and F: TEPA-CDs, C and G: APTMS-SiQDs, D and H: N-SiQDs, the material dosage was 0.64 mg/mL and 0.07 mg/mL for *S. aureus* and *E. coli*, respectively).

Fig. S5 Photographs of bacterial colonies of *S. aureus* (A-C) and *E. coli* (D-F) cells with different treatments, respectively. (a and d: normal saline + 10 mM H<sub>2</sub>O<sub>2</sub>, b and e: 2 mg/mL N-SiQDs-AuNPs + 10 mM H<sub>2</sub>O<sub>2</sub>, c and f: 2 mg/mL citric-AuNPs + 10 mM H<sub>2</sub>O<sub>2</sub>)

Fig. S6 Fluorescence images of live (green)/dead (red) of *S. aureus* and *E. coli* corresponding to the Fig.5 G and H. Table S1 The comparison of N-SiQDs-AuNPs and reported gold nanoparticles for the catalytic degradation of 4-NP.

Fig. S7 Scavenging activity of N-SiQDs to DPPH radicals.

**Figures :**

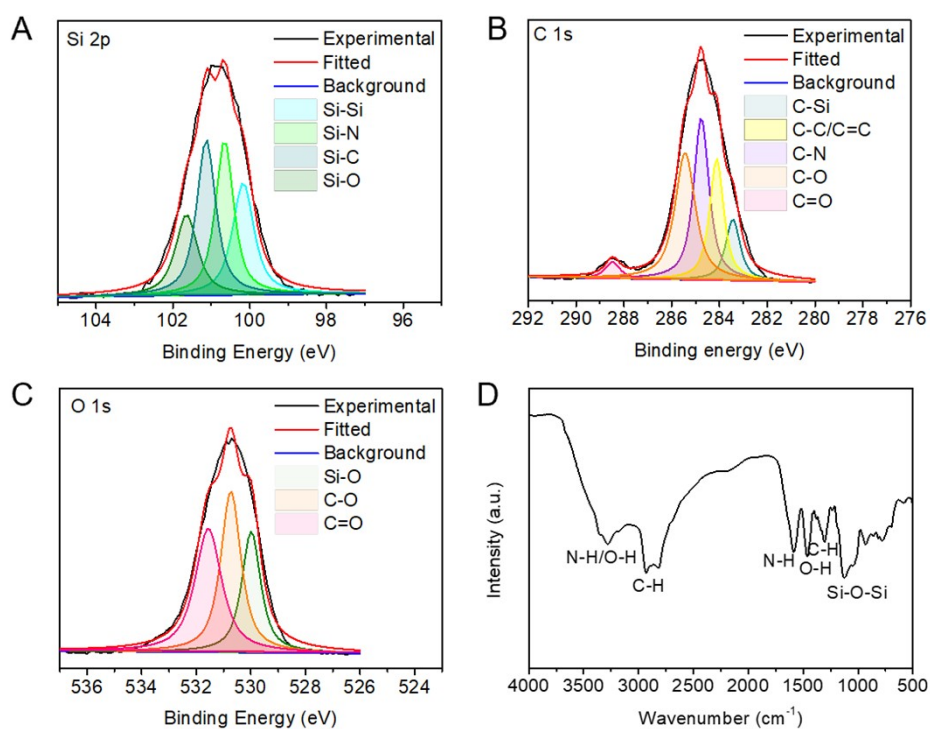

Fig. S1 The Si 2p (A), C 1s (B) and O 1s (C) XPS spectrum, and FT-IR spectrum (D) of N-SiQDs.

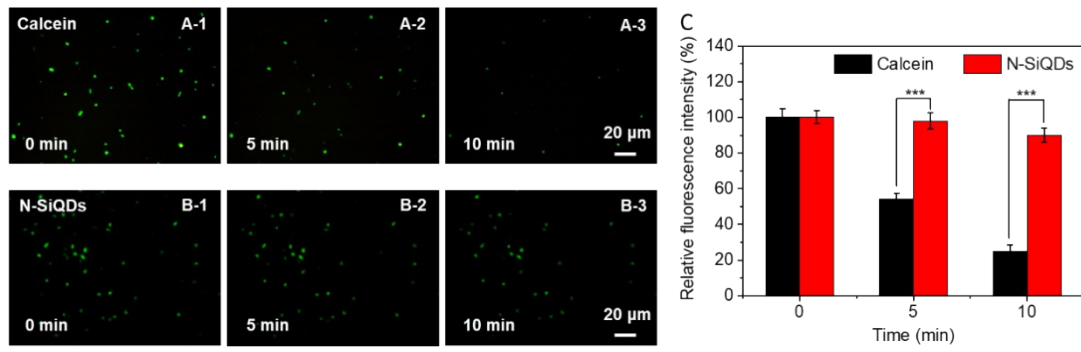

Fig. S2 The photobleaching resistance of calcein (A) and N-SiQDs (B) labeled bacteria. (C) The fluorescence quantitative results under different conditions. \*\*\* $p < 0.005$ .

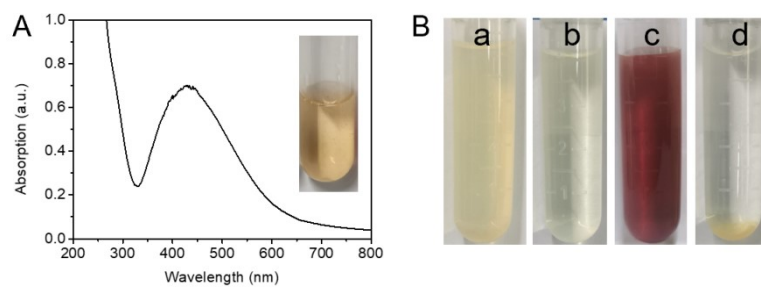

Fig. S3 (A) The UV spectrum and photograph (insert) of N-SiQDs mixed with AgNO<sub>3</sub>. (B) Photographs of TEPA-CDs (a), APTMS-SiQDs (b), N-SiQDs (c) and TEPA-CDs/APTMS-SiQDs (v/v=1:1) (d) mixed with HAuCl<sub>4</sub>, respectively.

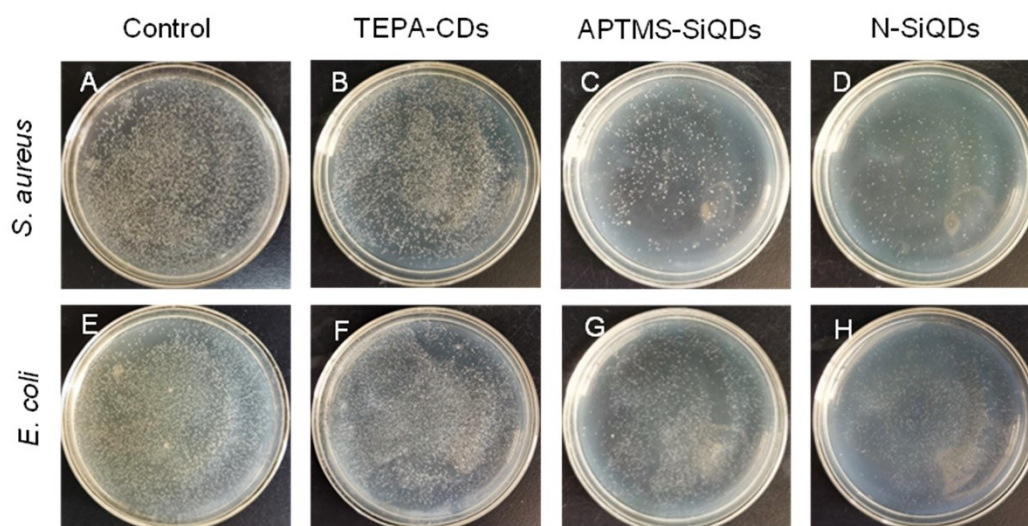

Fig. S4 Photographs of bacterial colonies of *S. aureus* (A-D) and *E. coli* (E-H) cells with different treatments, respectively. (A and E: normal saline, B and F: TEPA-CDs, C and G: APTMS-SiQDs, D and H: N-SiQDs, the material dosage was 0.64 mg/mL and 0.07 mg/mL for *S. aureus* and *E. coli*, respectively)

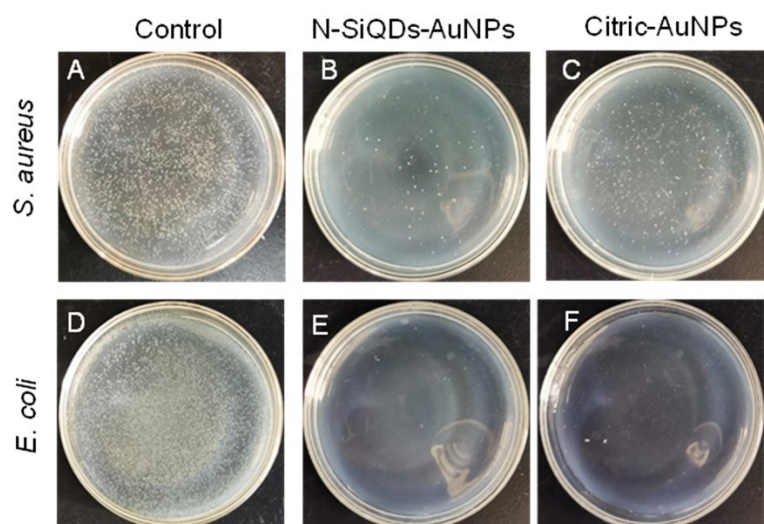

Fig. S5 Photographs of bacterial colonies of *S. aureus* (A-C) and *E. coli* (D-F) cells with different treatments, respectively. (a and d: normal saline + 10 mM H<sub>2</sub>O<sub>2</sub>, b and e: 2 mg/mL N-SiQDs-AuNPs + 10 mM H<sub>2</sub>O<sub>2</sub>, c and f: 2 mg/mL citric-AuNPs + 10 mM H<sub>2</sub>O<sub>2</sub>)

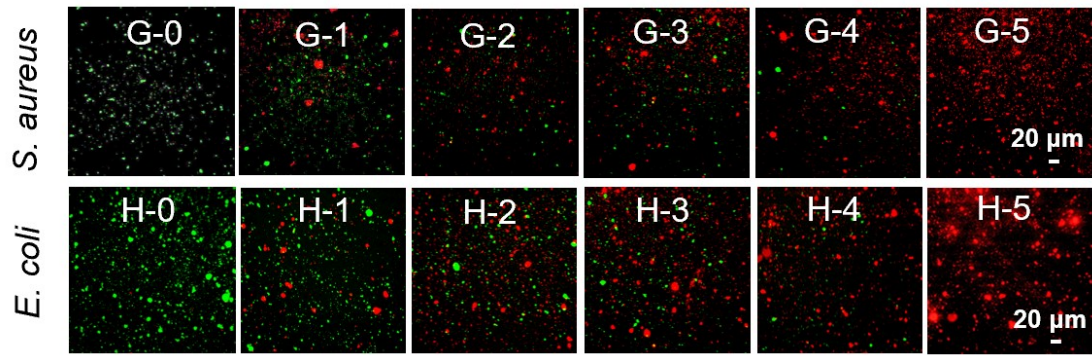

Fig. S6 Fluorescence images of live (green)/dead (red) of *S. aureus* and *E. coli* corresponding to the Fig.5 G and H.

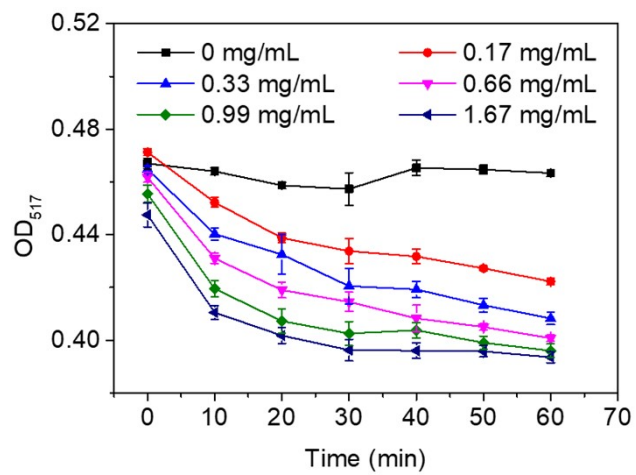

Fig. S7 Scavenging activity of N-SiQDs to DPPH radicals.



Table S1 The comparison of N-SiQDs-AuNPs and reported gold nanoparticles for the catalytic degradation of 4-NP.

| Catalyst                 | Composition                                                      | Catalytic rate constant (k) ( $10^{-3} \text{ s}^{-1}$ ) | Reference |
|--------------------------|------------------------------------------------------------------|----------------------------------------------------------|-----------|
| PVP <sub>12</sub> -AuNPs | PVP (12 mM) coated gold nanoparticles                            | 6.8                                                      | 1         |
| PVP <sub>25</sub> -AuNPs | PVP (25 mM) coated gold nanoparticles                            | 3.9                                                      |           |
| PVP <sub>50</sub> -AuNPs | PVP (50 mM) coated gold nanoparticles                            | 3.9                                                      |           |
| AuNP-CC                  | Gold nanoparticles prepared with Citrus limon juice as reductant | 0.139                                                    | 2         |
| GNT-AAO                  | Gold nanotube/porous anodic aluminium oxide composite membrane   | 0.132                                                    | 3         |
| SiNWs-AuNPs              | Gold nanoparticles coated silicon nanowires                      | 0.204                                                    | 4         |
| Cirtic-AuNPs             | Sodium citrate stabilized gold nanoparticles                     | 1.690                                                    | This work |
| N-SiQDs-AuNPs            | Nanocomposites with N-SiQDs and gold nanoparticles               | 19.31                                                    | This work |

#### References

- 1 M.S.A. Cerimedo, L.G. Baronio, C.E. Hoppe, M.A. Ayude, *ChemistrySelect*, 2019, **4**, 608-616.
- 2 Y. Anwar, I. Ullah, M. Ul-Islam, K.M. Alghamdi, A. Khalil, T. Kamal, *Arab. J. Chem.*, 2021, **14**, 103327.
- 3 Y. Yu, K. Kant, J.G. Shapter, J. Addai-Mensah, D. Losic, *Microporous Mesoporous Mater.*, 2012, **153**, 131-136.
- 4 S. Amdouni, Y. Cherifi, Y. Coffinier, A. Addad, M.A. Zaibie, M. Oueslati, R. Boukherroub, *Mater. Sci. Semicond. Process.*, 2017, **75**, 206-213.
